# Supplementary material
Source: Springer Nature journal article supplement (https://www.springermedizin.de/resource/supplementary/12913_2012_2593_MOESM1_ESM.docx/9531008)
Supplement: MOESM1 [file 9531008]

## Table 1: Characteristics of women affected by obstetric fistula who were interviewed at CCBRT hospital, Tanzania, 2008-2010.

| **Woman** | **Age**  **(years)** | **Marital status** | **Years in School** | **Duration with Fistula** | **Domicile** |
| --- | --- | --- | --- | --- | --- |
| 1 | 19 | Single | 7 | 4 months | Morogoro |
| 2 | 25 | Married | 3 | >1 year | Tanga |
| 3 | 35 | Single | 7 | 18 years | Kilwa |
| 4 | 20 | Divorced | 7 | 6 months | Pwani |
| 5 | 28 | Married | 12 | 2 months | Dar es Salaam |
| 6 | 30 | Married | 12 | 3 months | Iringa |
| 7 | 33 | Divorced | 7 | 19 years | Morogoro |
| 8 | 29 | Divorced | 0 | 10 years | Morogoro |
| 9 | 35 | Married | 7 | 2 years | Singida |
| 10 | 40 | Married | 7 | 1 year | Dodoma |
| 11 | 43 | Separated | 7 | 20 years | Dodoma |
| 12 | 40 | Single | 7 | 20 years | Singida |
| 13 | 25 | Divorced | 7 | 8 months | Iringa |
| 14 | 28 | Divorced | 7 | 12 years | Dodoma |
| 15 | 29 | Divorced | 0 | 9 years | Dodoma |
| 16 | 18 | Single | 0 | 3 months | Dodoma |
